# Supplementary material for: Sex-Dependent Mediation of Leptin in the Association of Perilipin Polymorphisms with BMI and Plasma Lipid Levels in Children
Source: MDPI journal article supplement (doi:10.3390/nu14153072), 2022-07-26
Supplement: s1 [file s1]

*Supplementary Materials*

# **Sex-Dependent Mediation of Leptin in the Association of Perilipin Polymorphisms with BMI and Plasma Lipid Levels in Children**

Claudia Vales-Villamarín <sup>1</sup>, Jairo Lumpuy-Castillo <sup>2</sup>, Teresa Gavela-Pérez <sup>3</sup>, Olaya de Dios <sup>1</sup>, Iris Pérez-Nadador <sup>1</sup>, Leandro Soriano-Guillén <sup>3</sup> and Carmen Garcés <sup>1,\*</sup>

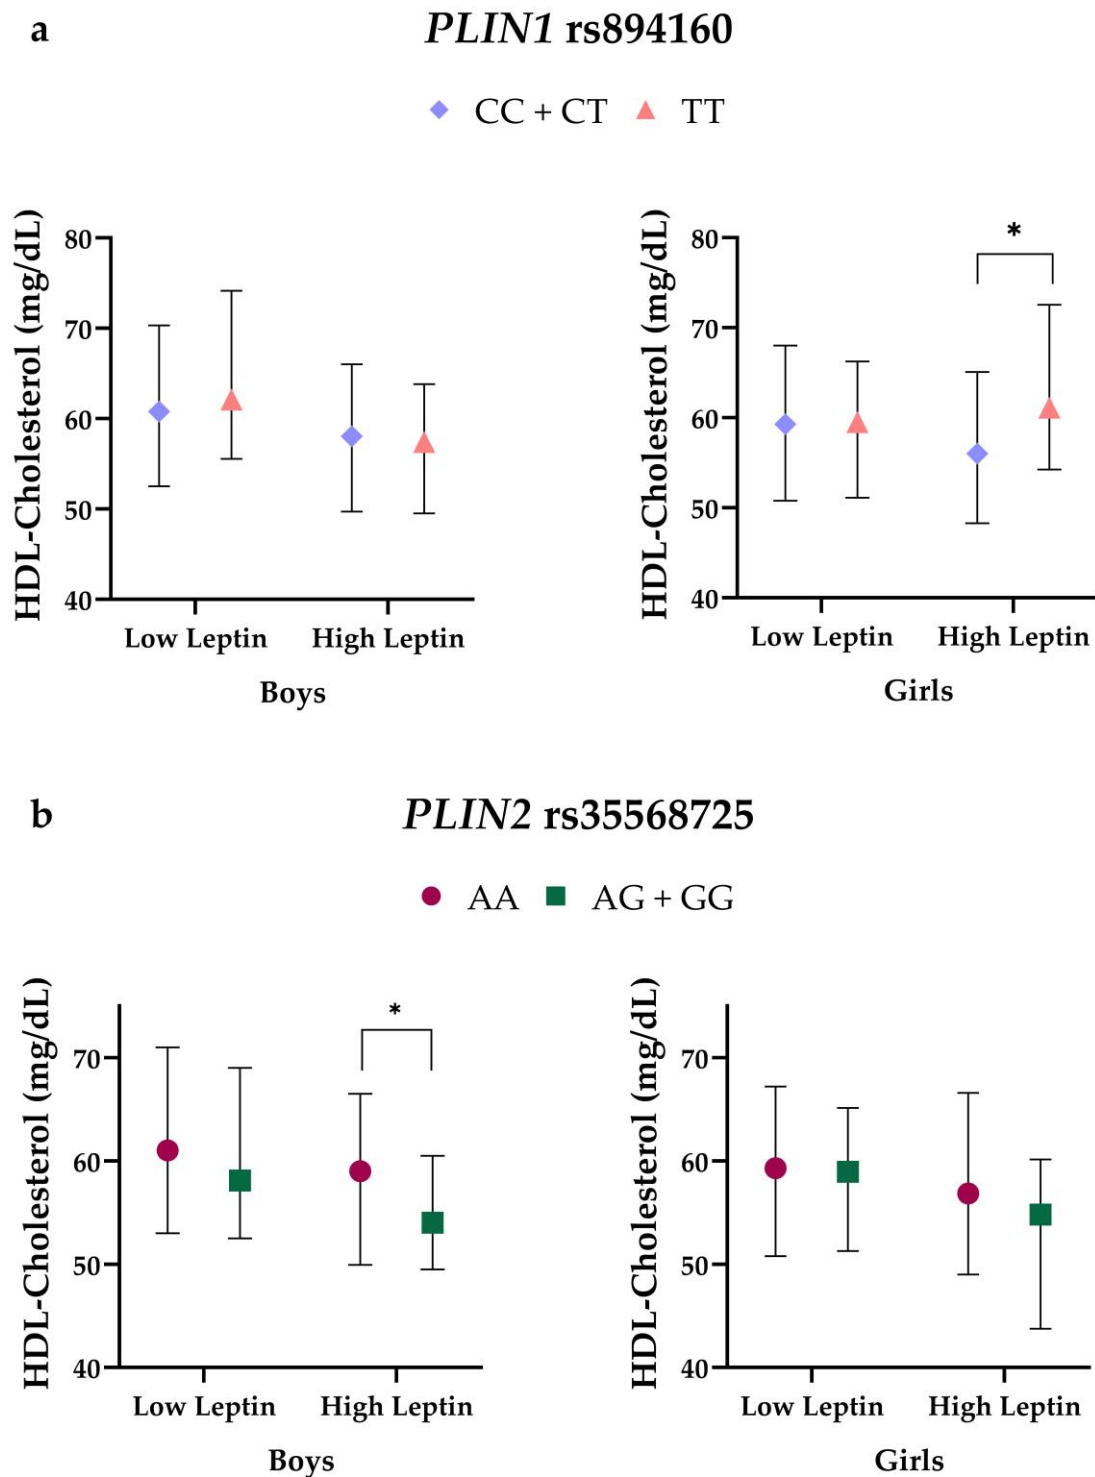

**Figure S1.** (a) HDL-cholesterol levels of *PLIN1*rs894160 genotypes in boys and girls according to levels of leptin; (b) HDL-cholesterol levels of *PLIN2*rs35568725 genotypes in boys and girls by leptin levels. Values are expressed as median and interquartile range. *p*-value: Mann–Whitney U test: \* *p*-value < 0.05; \*\* *p*-value < 0.01.
